# Supplementary material for: The Drosophila drop-dead gene is required for eggshell integrity
Source: PubMed Central journal article supplement (PMC10697589; doi:10.1371/journal.pone.0295412), 2023-12-05
Supplement: pone.0295412.s003.pdf [file pone.0295412.s003.pdf]

**A: genomic DNA**

**wild-type**

TAATTGTAGGTATTCGCCAGGTCTAGCATTATATAGAGAATTGTATTTTTTGTGTTTTTTATTTGCTCAACGCAGCTCGA

***drd<sup>1</sup>***

TAATTGTAGGTATTCGCCAGGTCTAGCATTATATAGAGAATTGTATTTTTTGTGTTTTTTATTAGCTCAACGCAGCTCGA

**B: cDNA**

**wild-type**

CAACTTTGTTTCGATAATTC TCGATACCAACGAATTCATATCG

***drd<sup>1</sup>***

CAACTTTGTTTCGATAATTC **TCAACGCAG**CTCGATACCAACGAATTCATATCG
