# Supplementary material for: The Drosophila drop-dead gene is required for eggshell integrity
Source: PubMed Central journal article supplement (PMC10697589; doi:10.1371/journal.pone.0295412), 2023-12-05

A

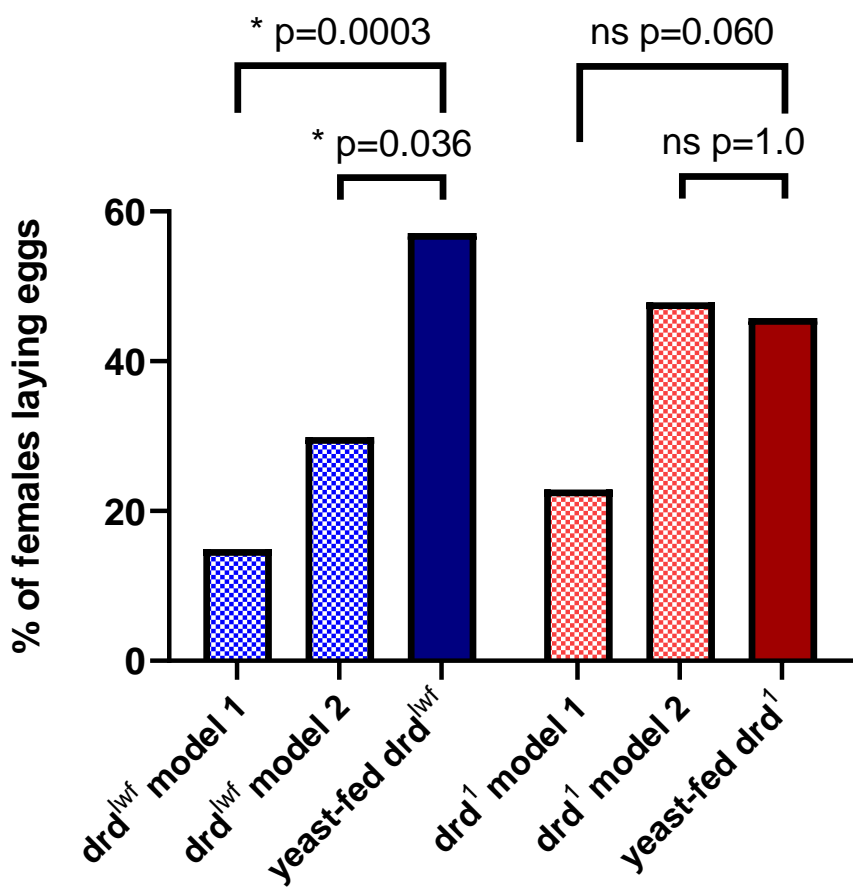

B

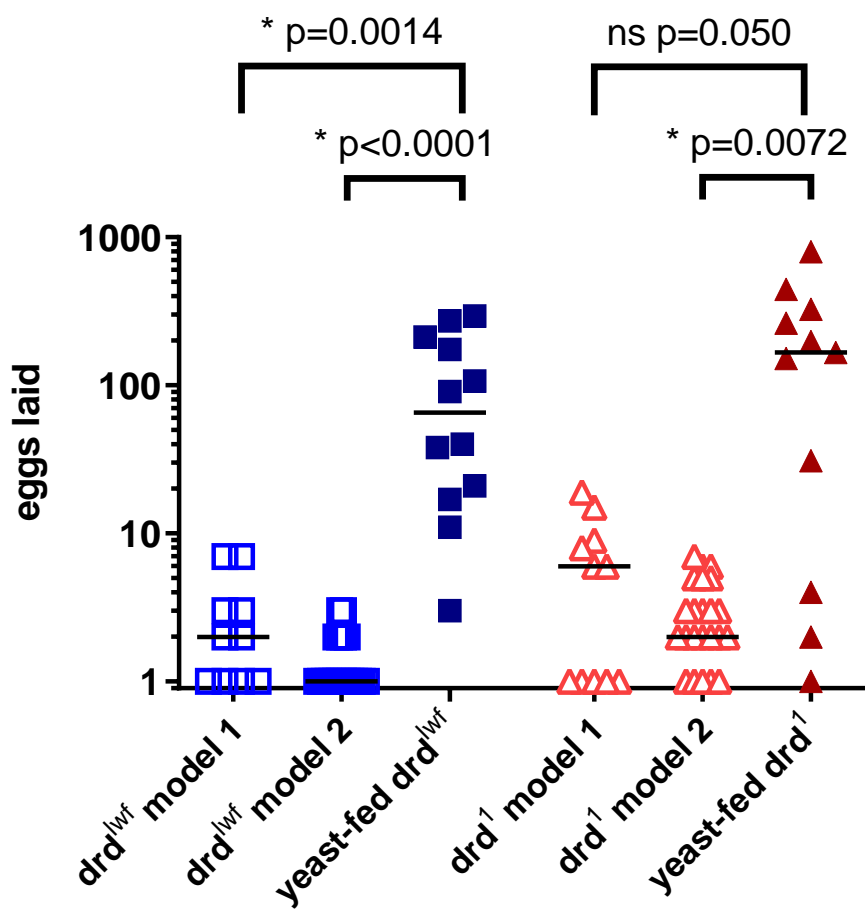

Supplement: pone.0295412.s004.pdf [file pone.0295412.s004.pdf]
