# Supplementary material for: The Drosophila drop-dead gene is required for eggshell integrity
Source: PubMed Central journal article supplement (PMC10697589; doi:10.1371/journal.pone.0295412), 2023-12-05
Supplement: pone.0295412.s006.pdf [file pone.0295412.s006.pdf]

A

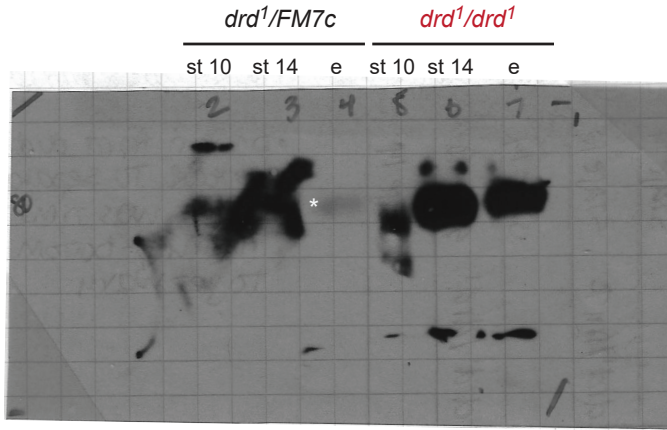

Vm26Ab

B

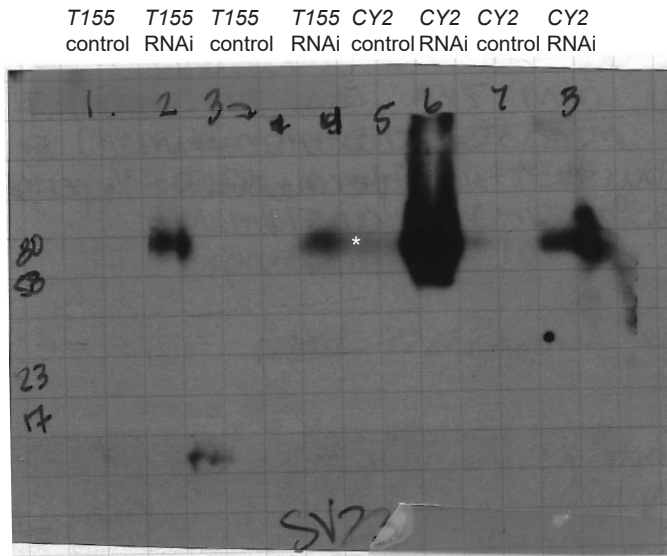

Vm26Ab

C

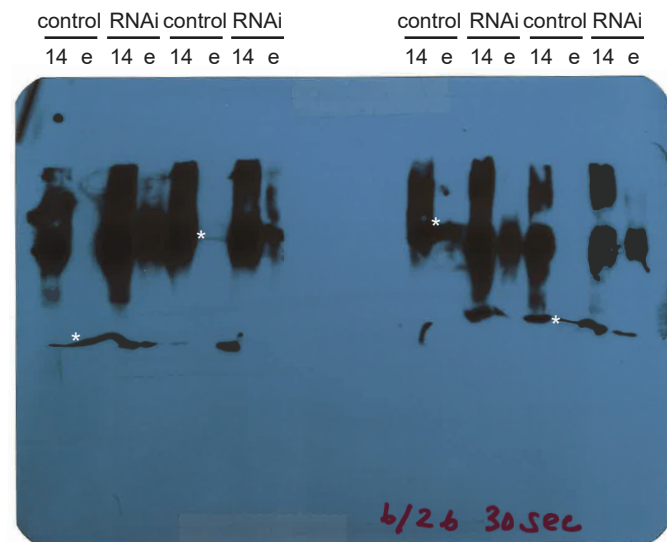

Vm26Ab
