# Supplementary material for: The Drosophila drop-dead gene is required for eggshell integrity
Source: PubMed Central journal article supplement (PMC10697589; doi:10.1371/journal.pone.0295412), 2023-12-05

**A**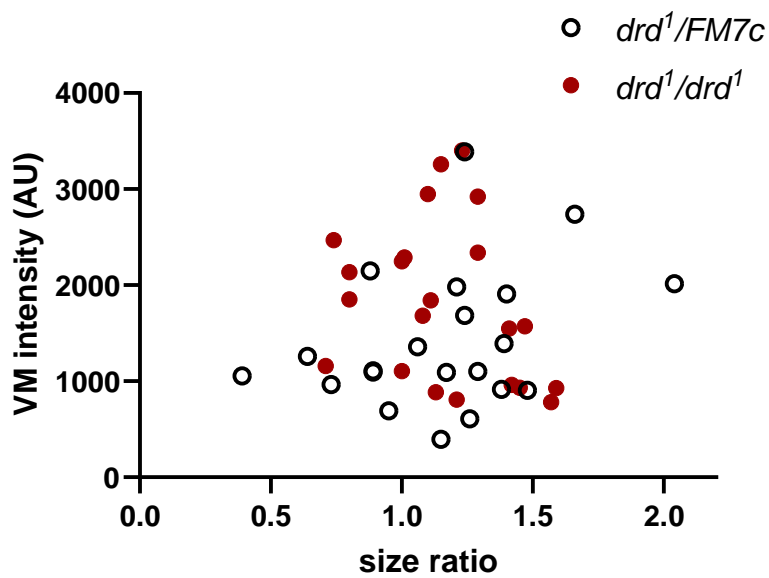**B**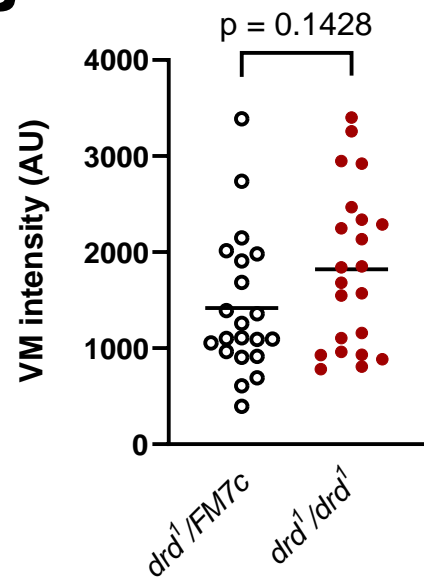**C**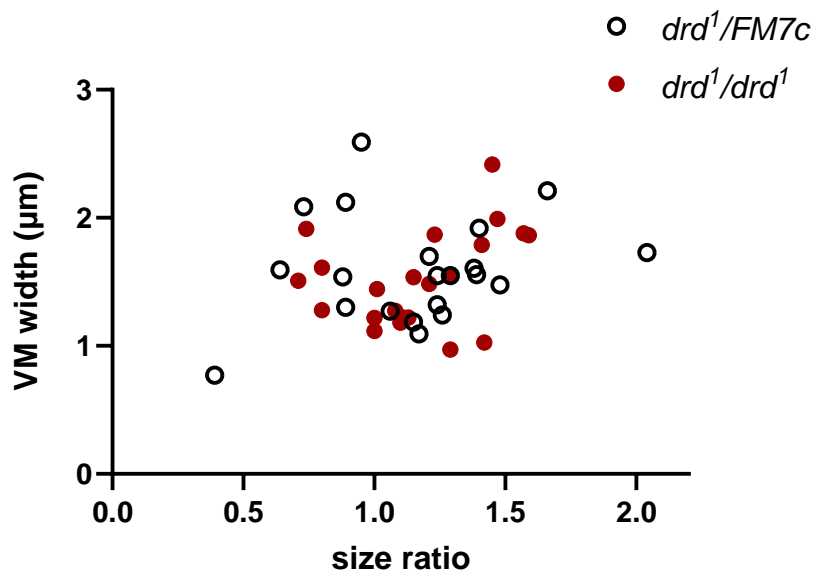**D**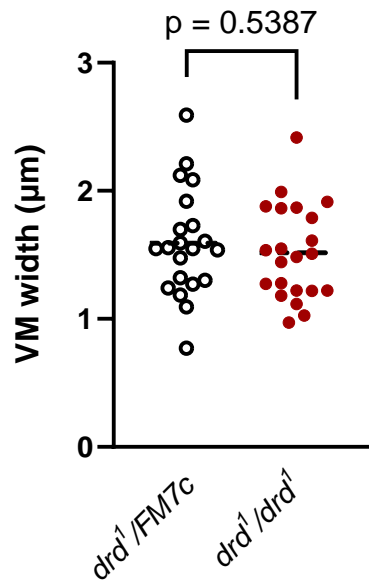

Supplement: pone.0295412.s007.pdf [file pone.0295412.s007.pdf]
